# Supplementary material for: Detection of pTDP‐43 via routine muscle biopsy: A promising diagnostic biomarker for amyotrophic lateral sclerosis
Source: PubMed Central journal article supplement (PMC11483524; doi:10.1111/bpa.13261), 2024-04-11
Supplement: BPA-34-e13261-s001.pdf [file BPA-34-e13261-s001.pdf]

**Supplementary Table 1. The demographic and clinical characteristics of non-ALS patients**

| Patient ID | Gender | Age at muscle biopsy (y) | Site of muscle biopsy (1=biceps brachii ,2=deltoid,3=quadriceps,4=fibialis anterior, 5=vastus lateralis, 6=gastrocnemius, 7= soleus) | Pathological diagnosis                                         | Mutation gene | Final diagnosis | pTDP-43 score |
|------------|--------|--------------------------|--------------------------------------------------------------------------------------------------------------------------------------|----------------------------------------------------------------|---------------|-----------------|---------------|
| Ctrl-01    | male   | 53                       | 2                                                                                                                                    | myogenic damage combined with mild neurogenic muscular atrophy | HNRNPDL       | LGMD            | 5             |
| Ctrl-02    | male   | 12                       | 3                                                                                                                                    | mild myogenic damage                                           | KCNJ2         | PP              | 0             |
| Ctrl-03    | male   | 30                       | 2                                                                                                                                    | myogenic damage                                                | GIPC1         | OPDM            | 0             |
| Ctrl-04    | male   | 25                       | 2                                                                                                                                    | mild myogenic damage                                           | FSHD1 2DRU    | FSHD            | 0             |
| Ctrl-05    | male   | 31                       | 1                                                                                                                                    | myogenic damage                                                | FSHD1 4.5DRU  | FSHD            | 0             |
| Ctrl-06    | female | 47                       | 2                                                                                                                                    | myogenic damage                                                | FSHD1 5DRU    | FSHD            | 1             |
| Ctrl-07    | female | 20                       | 1                                                                                                                                    | mild myogenic damage                                           | FSHD1 4DRU    | FSHD            | 0             |
| Ctrl-08    | female | 22                       | 4                                                                                                                                    | dysferlin deficient muscular dystrophy                         | DYSF          | LGMD            | 0             |
| Ctrl-09    | male   | 20                       | 1                                                                                                                                    | mild myogenic damage                                           | COQ7          | CMT             | 0             |
| Ctrl-10    | female | 32                       | 5                                                                                                                                    | dysferlin deficient muscular dystrophy                         | DYSF          | LGMD            | 0             |
| Ctrl-11    | male   | 43                       | 2                                                                                                                                    | mild myogenic damage                                           | FSHD1 5DRU    | FSHD            | 4             |
| Ctrl-12    | male   | 34                       | 1                                                                                                                                    | myogenic damage                                                | FSHD1 5DRU    | FSHD            | 0             |
| Ctrl-13    | male   | 52                       | 3                                                                                                                                    | myogenic damage                                                | HNRNPA1       | LGMD            | 4             |
| Ctrl-14    | female | 63                       | 1                                                                                                                                    | myogenic damage,dermatomyositis                                | ND            | IM              | 6             |
| Ctrl-15    | female | 44                       | 2                                                                                                                                    | myogenic damage                                                | ND            | IM              | 3             |
| Ctrl-16    | female | 46                       | 1                                                                                                                                    | myogenic damage                                                | ND            | IM              | 0             |
| Ctrl-17    | male   | 68                       | 2                                                                                                                                    | myogenic damage                                                | PABPN1        | OPMD            | 2             |

|         |        |    |   |                                                                   |            |                       |   |
|---------|--------|----|---|-------------------------------------------------------------------|------------|-----------------------|---|
| Ctrl-18 | male   | 15 | 2 | mild myogenic damage                                              | FSHD1 8DRU | FSHD                  | 0 |
| Ctrl-19 | male   | 44 | 2 | myogenic damage                                                   | Dystrophin | BMD                   | 0 |
| Ctrl-20 | female | 6  | 5 | myogenic damage,dermatomyositis                                   | ND         | IM                    | 0 |
| Ctrl-21 | male   | 61 | 2 | myogenic damage,polymyositis                                      | ND         | IM                    | 2 |
| Ctrl-22 | male   | 33 | 1 | myogenic damage,mitochondrial myopathy                            | ND         | mitochondrial disease | 0 |
| Ctrl-23 | female | 30 | 1 | mild myogenic damage                                              | GAA        | GSD                   | 0 |
| Ctrl-24 | female | 18 | 2 | mild myogenic damage                                              | ND         | mitochondrial disease | 0 |
| Ctrl-25 | male   | 22 | 6 | lipid storage myopathy                                            | ETFDH      | LSM                   | 0 |
| Ctrl-26 | male   | 45 | 3 | mild to moderate muscular dystrophy                               | HNRNPDL    | LGMD                  | 0 |
| Ctrl-27 | female | 24 | 1 | lipid storage myopathy                                            | ETFDH      | LSM                   | 0 |
| Ctrl-28 | male   | 32 | 3 | moderate muscular dystrophy                                       | CAPN3      | LGMD                  | 0 |
| Ctrl-29 | male   | 41 | 7 | mild myogenic damage                                              | ND         | LSM                   | 0 |
| Ctrl-30 | female | 67 | 1 | oculopharyngeal muscular dystrophy                                | PABPN1     | OPMD                  | 3 |
| Ctrl-31 | female | 58 | 1 | myogenic damage                                                   | PABPN1     | OPMD                  | 2 |
| Ctrl-32 | female | 51 | 6 | mild myogenic damage                                              | FSHD1 7DRU | FSHD                  | 0 |
| Ctrl-33 | female | 45 | 2 | muscular dystrophy                                                | DMPK       | myotonic dystrophy    | 0 |
| Ctrl-34 | female | 20 | 2 | myogenic damage,lipid storage myopathy                            | ETFDH      | LSM                   | 0 |
| Ctrl-35 | female | 44 | 2 | myogenic damage,glycogen storage disease                          | GAA        | GSD                   | 1 |
| Ctrl-36 | female | 31 | 3 | muscular dystrophy                                                | GAA        | GSD                   | 0 |
| Ctrl-37 | male   | 40 | 2 | mild myogenic damage combined with<br>neurogenic muscular atrophy | XK         | McLeod syndrome       | 0 |

|         |        |    |   |                                                                   |            |                       |   |
|---------|--------|----|---|-------------------------------------------------------------------|------------|-----------------------|---|
| Ctrl-38 | male   | 39 | 2 | mild myogenic damage,lipid storage myopathy                       | ETFDH      | LSM                   | 0 |
| Ctrl-39 | male   | 20 | 1 | myogenic damage,mitochondrial myopathy                            | ND         | mitochondrial disease | 0 |
| Ctrl-40 | male   | 5  | 1 | dystrophin deficient muscular dystrophy                           | Dystrophin | DMD                   | 0 |
| Ctrl-41 | male   | 72 | 4 | myogenic damage combined with neurogenic<br>muscular atrophy      | NOTCH2NLC  | NIID                  | 4 |
| Ctrl-42 | male   | 20 | 3 | myogenic damage                                                   | FSHD1 4DRU | FSHD                  | 0 |
| Ctrl-43 | male   | 41 | 4 | mild myogenic damage combined with<br>neurogenic muscular atrophy | HNRNPDL    | LGMD                  | 0 |
| Ctrl-44 | male   | 36 | 3 | myogenic damage                                                   | FSHD1      | FSHD                  | 0 |
| Ctrl-45 | female | 50 | 1 | mitochondrial myopathy                                            | ND         | mitochondrial disease | 2 |
| Ctrl-46 | male   | 64 | 3 | inflammatory myopathy                                             | ND         | IM                    | 0 |
| Ctrl-47 | female | 57 | 1 | myotonic dystrophy                                                | DMPK       | myotonic dystrophy    | 0 |
| Ctrl-48 | male   | 27 | 3 | normal                                                            | ND         | Health (Psychogenic)  | 0 |
| Ctrl-49 | male   | 59 | 2 | myogenic damage,inflammatory myopathy                             | ND         | IM                    | 5 |
| Ctrl-50 | male   | 12 | 1 | myogenic damage                                                   | ND         | IM                    | 0 |
| Ctrl-51 | female | 57 | 4 | muscular dystrophy                                                | RILPL1     | OPDM                  | 1 |
| Ctrl-52 | male   | 20 | 1 | muscular dystrophy                                                | DYSF       | LGMD                  | 0 |
| Ctrl-53 | male   | 69 | 4 | rimmed vacuoles, inclusion body myositis                          | ND         | IBM                   | 4 |
| Ctrl-54 | female | 32 | 1 | mitochondrial myopathy                                            | ND         | mitochondrial disease | 0 |

---

LGMD: limb girdle muscular dystrophy; PP: periodic paralysis; OPDM: oculopharyngodistal myopathy; FSHD: facioscapulohumeral muscular dystrophy; CMT: Charcot-Marie-Tooth disease; IM: inflammatory myopathy; OPMD: oculopharyngeal muscular dystrophy; BMD: Becker muscular dystrophy; GSD: glycogen storage disease; LSM: lipid storage myopathy; DMD: Duchenn Muscular Dystrophy; NIID: neuronal intranuclear inclusion disease; IBM: inclusion body myositis; ND: not detected.

**Supplementary Table 2. The muscle pTDP-43 pathological features in ALS patients with different King’s College Stages based on previous studies and this study**

| King’s College Stage | pTDP-43 pathology |                                                                                                                   |                            | reference                                   |
|----------------------|-------------------|-------------------------------------------------------------------------------------------------------------------|----------------------------|---------------------------------------------|
|                      | Sample type       | Site of sample                                                                                                    | Proportion of pTDP43+ case |                                             |
| death                | autopsy           | tongue, diaphragm, biceps brachii muscle, rectus femoris muscle<br>intramuscular nerve bundles                    | +                          | 10/10<br>Kurashige, et al. <sup>11</sup>    |
| NS                   | biopsy            | intramuscular nerve bundles                                                                                       | +                          | 33/33                                       |
| NS                   | biopsy            | muscle                                                                                                            | +                          | NS<br>Tripathi, et al. <sup>23</sup>        |
| death                | autopsy           | axial (paraspinal, diaphragm) and appendicular muscles                                                            | +                          | 19/57<br>Cykowski, et al. <sup>9</sup>      |
| death                | autopsy           | diaphragm, iliopsoas muscle and myocardium<br>tongue, cervical muscle, diaphragm, iliopsoas muscle and myocardium | +                          | 5/16<br>30/30<br>Mori, et al. <sup>10</sup> |
| 1                    | biopsy            | biceps brachii, deltoid                                                                                           | +                          | 7/7                                         |
| 2                    |                   | biceps brachii, quadriceps, tibialis anterior                                                                     | +                          | 7/7                                         |
| 3                    |                   | biceps brachii, deltoid                                                                                           | +                          | 2/3                                         |
| 4                    |                   | biceps brachii                                                                                                    | +                          | 1/1                                         |

This study

**Supplementary Table 3. Summary of muscle pTDP-43 pathological features in ALS patients with different gene mutations based on previous studies and this study**

| Gene    |         |         |                     |                      | pTDP-43 pathology |                                                        |                      |                            | Reference                     |
|---------|---------|---------|---------------------|----------------------|-------------------|--------------------------------------------------------|----------------------|----------------------------|-------------------------------|
| Gene    | cDNA    | Protein | Mutation type       | Pathogenicity (ACMG) | Sample type       | Site of sample                                         | pTDP-43 accumulation | Proportion of pTDP43+ case |                               |
| C9ORF72 | /       | /       | short tandem repeat | P                    | autopsy           | axial (paraspinal, diaphragm) and appendicular muscles | +                    | 4/13                       | Cykowski et al. <sup>9</sup>  |
| VAPB    | 116C>T  | P56S    | missense mutation   | P                    | biopsy            | muscle                                                 | +                    | 1/1                        | Tripathi et al. <sup>23</sup> |
| C9ORF72 | /       | /       | short tandem repeat | P                    | biopsy            | biceps brachii, deltoid                                | +                    | 3/3                        | This study                    |
| SOD1    | 214C>T  | H72Y    | missense mutation   | LP                   | biopsy            | biceps brachii                                         | +                    | 2/2                        |                               |
|         | 449T>C  | I150T   | missense mutation   | P                    | biopsy            |                                                        |                      |                            |                               |
| FUS     | 1574C>T | P525L   | missense mutation   | P                    | biopsy            | deltoid                                                | -                    | 0/1                        |                               |

**Supplementary Table 4. The muscle pTDP-43 pathological features in non-ALS patients based on previous studies and this study**

| Classification of diseases                    | Diagnosis of pTDP43+ control                               | Sample type             | Site of sample                                                   | Proportion of pTDP43+ case | reference                    |
|-----------------------------------------------|------------------------------------------------------------|-------------------------|------------------------------------------------------------------|----------------------------|------------------------------|
| myogenic                                      | Inclusion Body Myositis (IBM)                              | biopsy                  | axial (paraspinous, diaphragm) and appendicular muscles          | 4/4                        | Cykowski,et al. <sup>9</sup> |
|                                               | MELAS,Mitochondrial encephalomyopathy                      |                         | diaphragm, iliopsoas muscle                                      | 1/2                        |                              |
|                                               | myotonic dystrophy                                         |                         | diaphragm                                                        | 2/2                        |                              |
|                                               | polymyositis                                               |                         | cervical muscle, diaphragm, iliopsoas muscle, myocardium         | 1/1                        |                              |
|                                               | congenital myopathy                                        | autopsy                 | tongue, cervical muscle, diaphragm                               | 2/2                        | Mori,et al. <sup>10</sup>    |
|                                               | Duchenne muscular dystrophy (DMD)                          |                         | myocardium                                                       | 1/2                        |                              |
|                                               | MERRF,Myoclonus epilepsy associated with ragged-red fibers |                         | diaphragm                                                        | 1/1                        |                              |
|                                               | mitochondrial cardiomyopathy                               |                         | diaphragm                                                        | 1/1                        |                              |
|                                               | Inclusion Body Myositis (IBM)                              |                         | tibialis anterior                                                | 1/1                        | This study                   |
|                                               | inflammatory myopathy (IM)                                 |                         | biceps brachii, deltoid                                          | 4/8                        |                              |
| mitochondrial disease                         |                                                            | biceps brachii          | 1/5                                                              |                            |                              |
| facioscapulohumeral muscular dystrophy (FSHD) | biopsy                                                     | deltoid                 | 2/10                                                             |                            |                              |
| glycogen storage disease (GSD)                |                                                            | deltoid                 | 1/3                                                              |                            |                              |
| limb girdle muscular dystrophy (LGMD)         |                                                            | deltoid, quadriceps     | 2/8                                                              |                            |                              |
| oculopharyngodistal myopathy (OPDM)           |                                                            | tibialis anterior       | 1/2                                                              |                            |                              |
| oculopharyngeal muscular dystrophy (OPMD)     |                                                            | biceps brachii, deltoid | 3/3                                                              |                            |                              |
| neurogenic                                    | cerebral trauma                                            |                         | diaphragm, iliopsoas muscle                                      | 1/1                        |                              |
|                                               | CMT type2A2                                                |                         | myocardium                                                       | 1/1                        |                              |
|                                               | neurolymphomatosis                                         | autopsy                 | tongue, cervical muscle, diaphragm, iliopsoas muscle, myocardium | 1/1                        | Mori,et al. <sup>10</sup>    |
|                                               | vascular leukoencephalopathy                               |                         | tongue                                                           | 1/1                        |                              |
|                                               | Multiple cerebral infarction                               |                         | diaphragm                                                        | 1/1                        |                              |
| neuromuscular junction                        | neuronal intranuclear inclusion disease (NIID)             | biopsy                  | tibialis anterior                                                | 1/1                        | This study                   |
|                                               | myasthenia gravis (MG)                                     |                         | diaphragm, iliopsoas muscle, myocardium, cervical muscle         | 2/4                        |                              |
| other                                         | drowning                                                   | autopsy                 | cervical muscle, diaphragm                                       | 1/1                        | Mori,et al. <sup>10</sup>    |
|                                               | bronchopneumonia                                           |                         | myocardium                                                       | 1/1                        |                              |

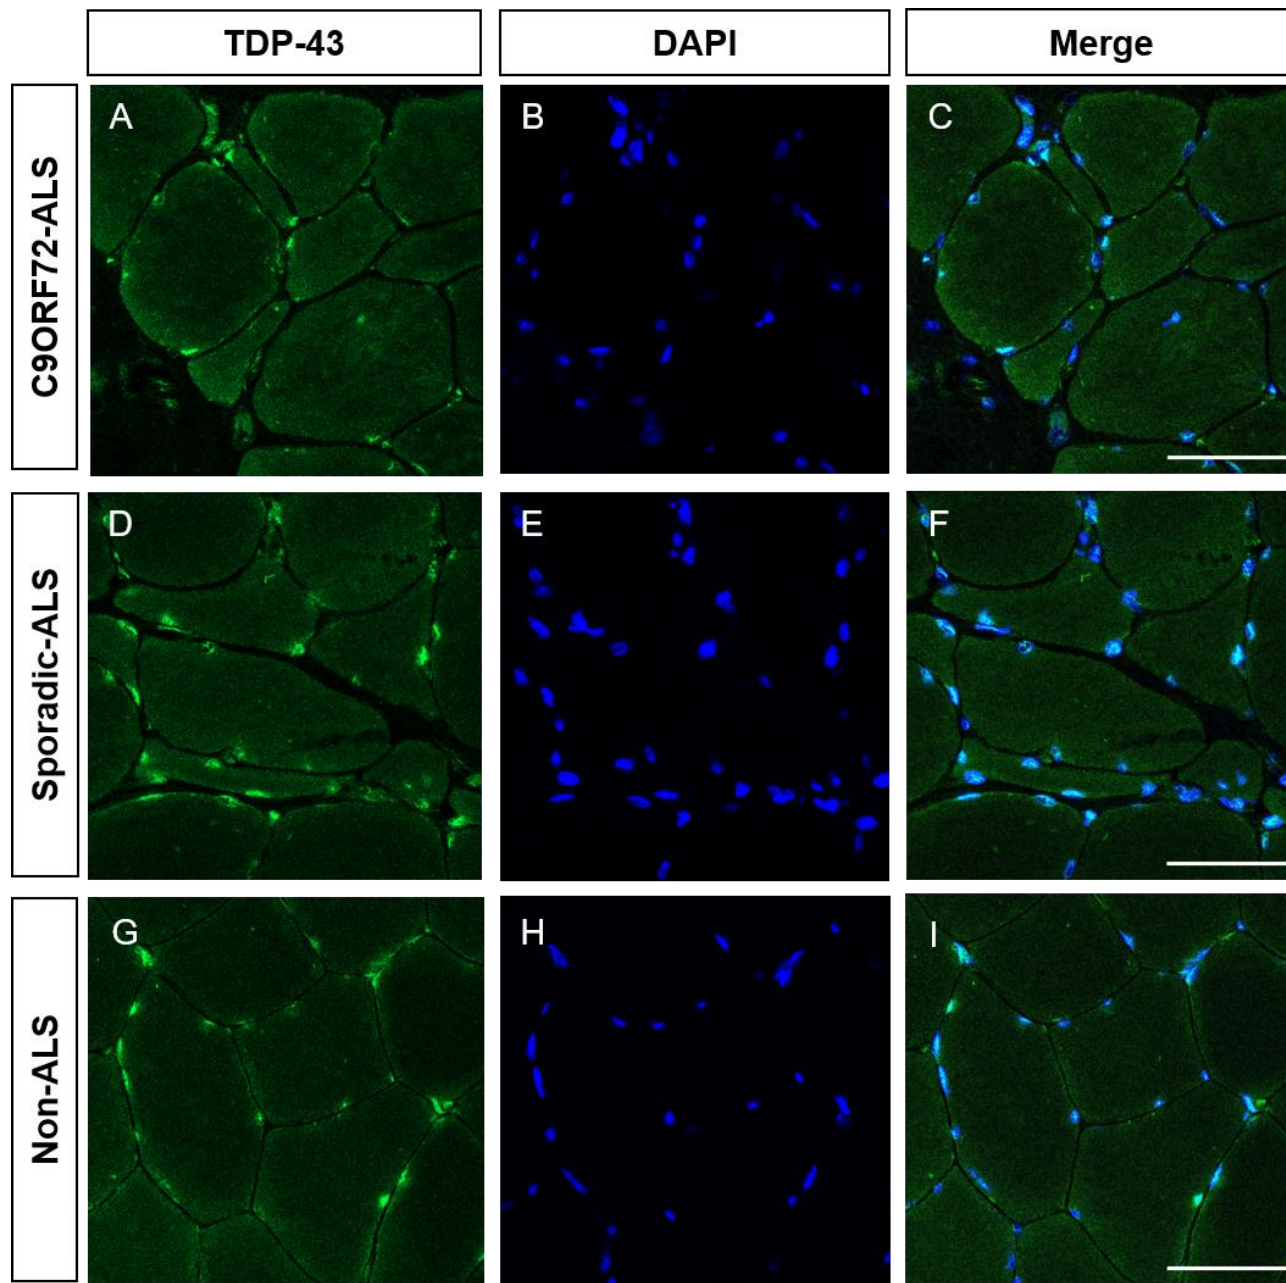

**Supplementary Figure 1** Immunofluorescence stained with anti-TDP-43 in patients with C9ORF72-ALS (A-C; ID: ALS-09), sporadic-ALS (D-F; ID: ALS-12), and Health (Psychogenic) (G-I; ID: Ctrl-48). Scale bar, 50 $\mu$ m.

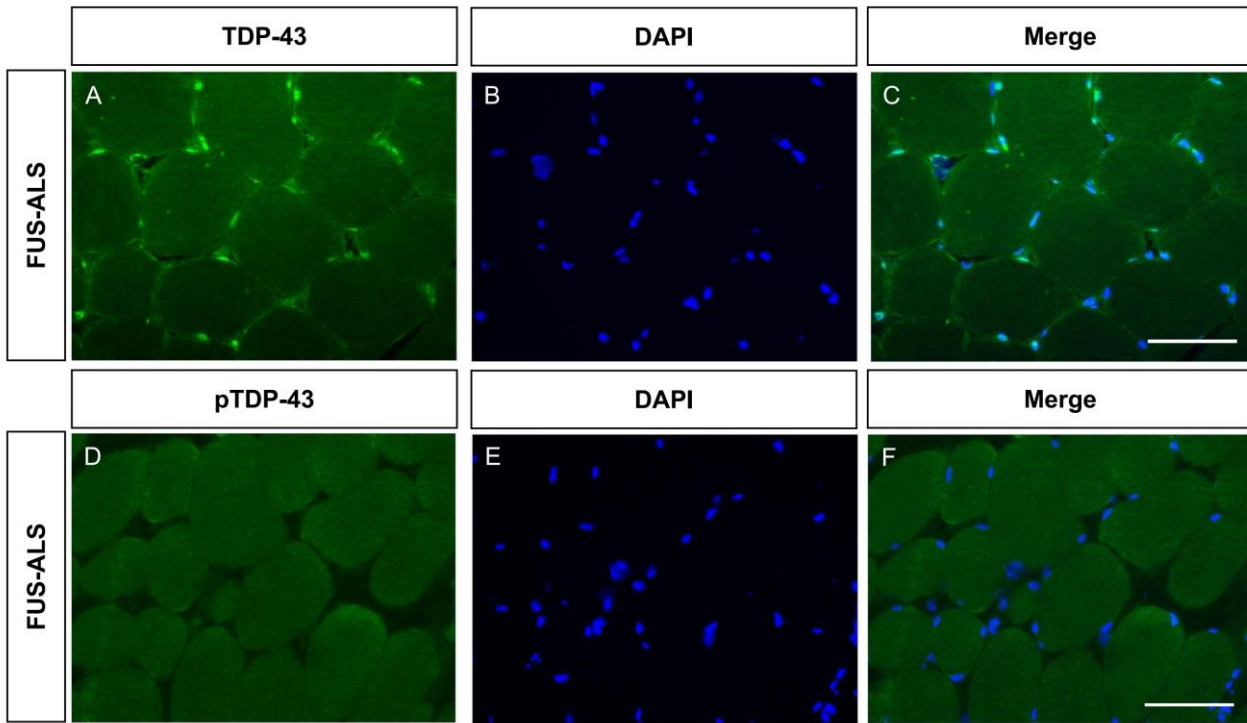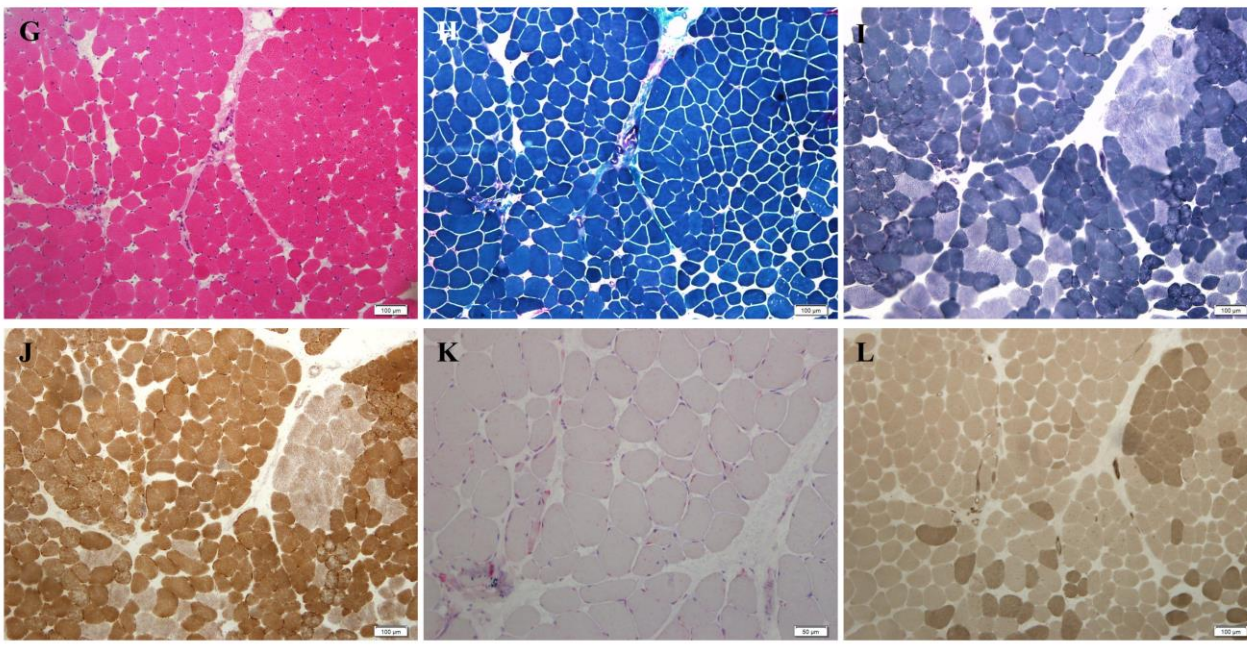



**Supplementary Figure 2** ALS-07 was a 16-year-old female patient, who developed progressive lower and upper limbs weakness at the age of 13. Physical examination showed UMN-dominant presentations, including hypermyotonia, brisk tendon reflexes, Hoffmann and Babinski signs. Family history was negative. She carried a de novo mutation of FUS: c.1574C>T, p.P525L. TDP-43 was expressed in the myofibers (**A-C**), without pTDP-43 aggregation (**D-F**). Scale bar, 75µm. Muscle pathology from the left deltoid muscle was shown. (**G**) Haematoxylin and eosin and (**H**) modified Gomori trichrome (mGT) stainings showed scattered mild to moderate atrophy of muscle fibers, mainly circular atrophy, a few hypertrophic muscle fibers, and mild hyperplasia of interstitial fiber connective tissue. (**I**) NADH-tetrazolium reductase (NADH-TR) and (**J**) succinate dehydrogenase & cytochrome C oxidase (SDH & COX) stainings showed some dark stained fibers with moth-eaten. (**K**) Acid phosphatase (ACP) staining showed no obvious abnormality. (**L**) ATPase pH 10.4 staining showed group distribution, and type I was dominant.

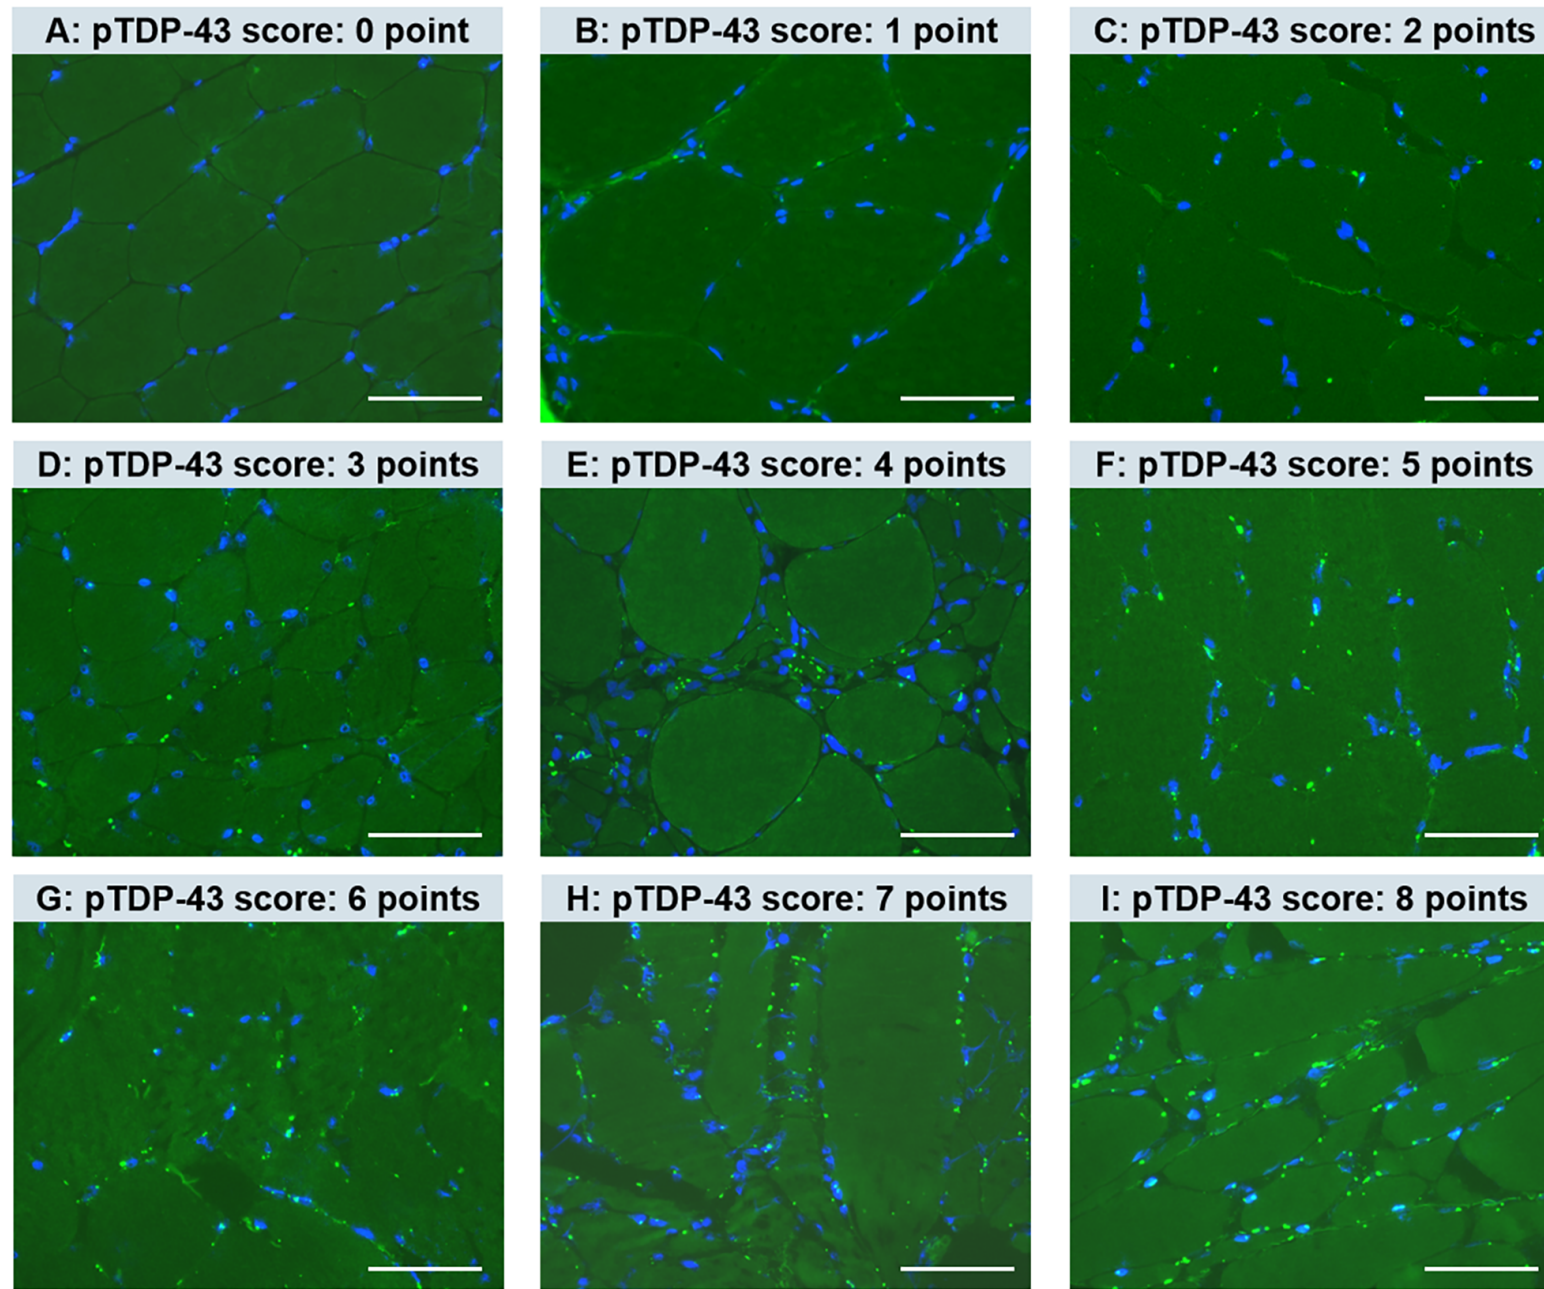

**Supplementary Figure 3** The semi-quantified pTDP-43 aggregates using pTDP-43 score system. Scale bar, 75μm.

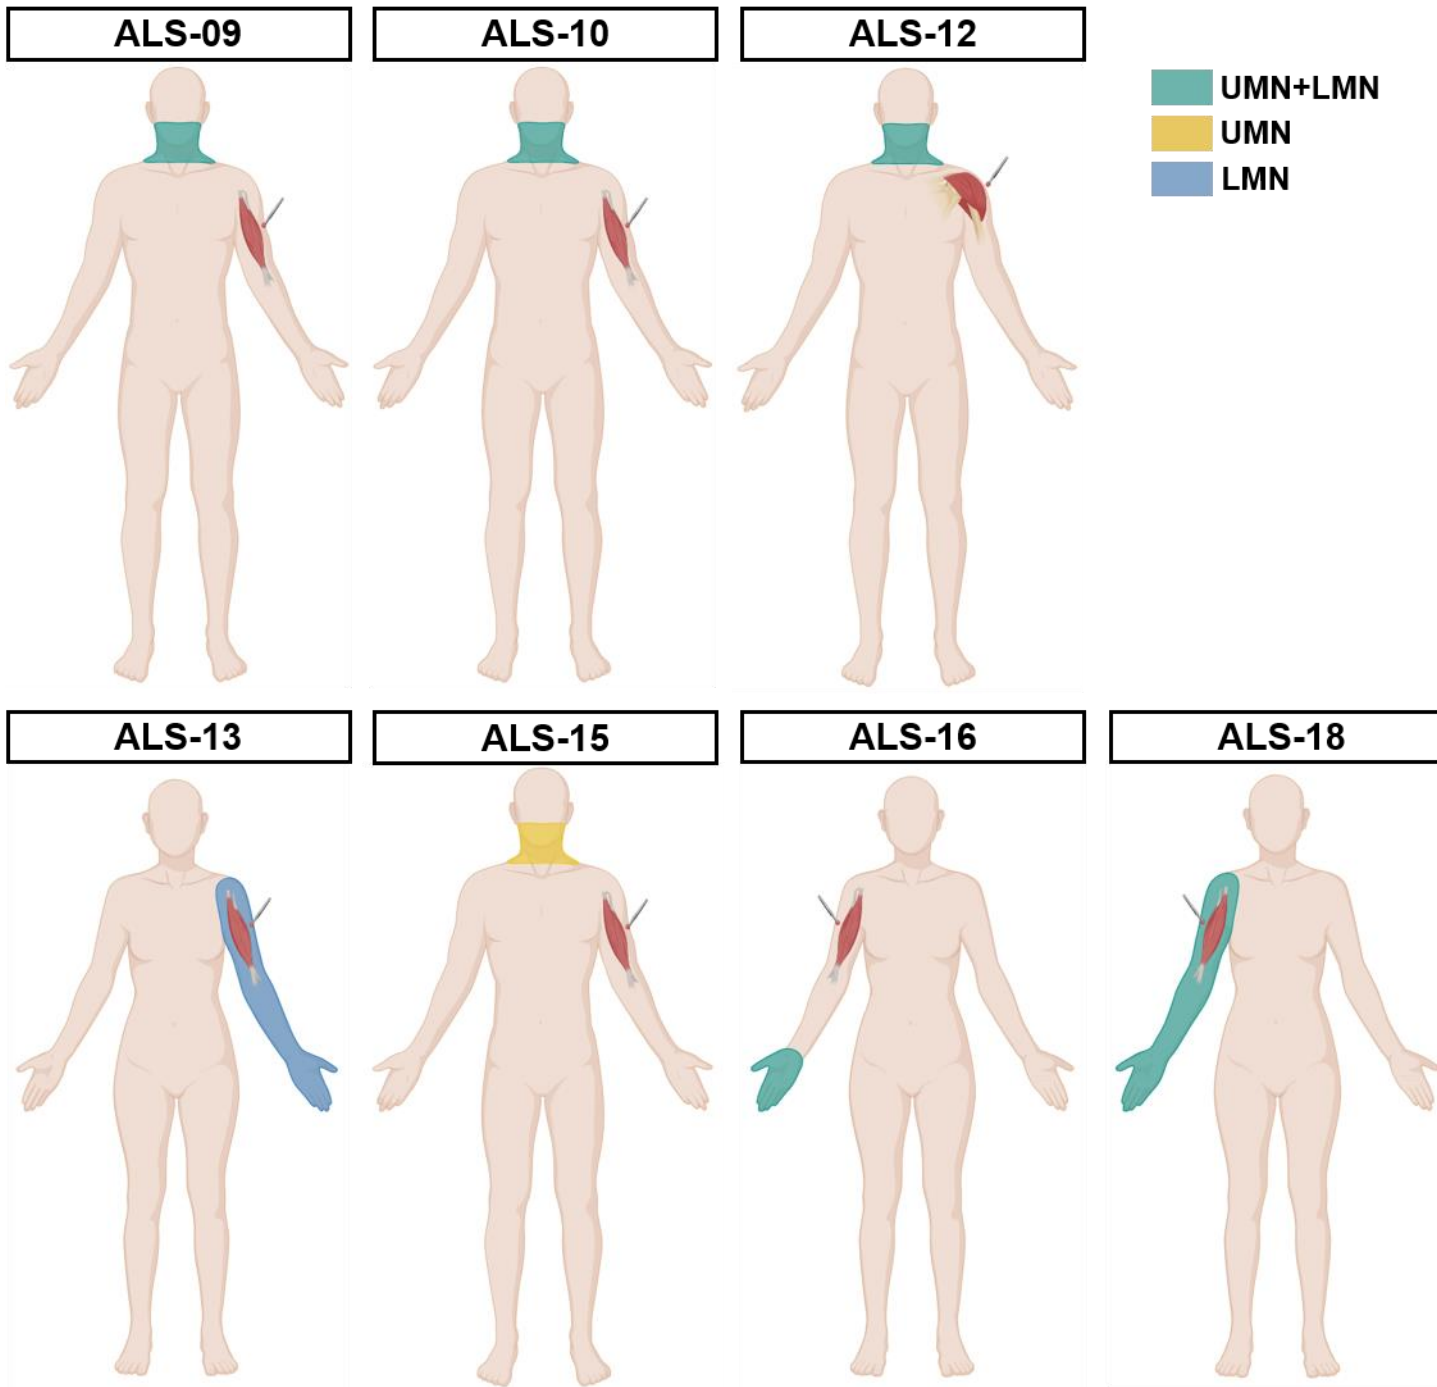

**Supplementary Figure 4** Schematic diagram of 7 early-stage ALS patients had only 1 body region affected clinically.

ALS-09, male, with symptoms of upper and lower motor neuron damage in the bulbar (green), underwent a left biceps brachii muscle biopsy.

ALS-10, male, with symptoms of upper and lower motor neuron damage in the bulbar (green), underwent a left biceps brachii muscle biopsy.

ALS-12, male, with symptoms of upper and lower motor neuron damage in the bulbar (green), underwent a left deltoid muscle biopsy.

ALS-13, female, with symptoms of lower motor neuron damage from the left hand to the shoulder (blue), underwent a left biceps brachii muscle biopsy.

ALS-15, male, with symptoms of upper motor neuron damage in the bulbar (yellow), underwent a left biceps brachii muscle biopsy.

ALS-16, female, with symptoms of upper and lower motor neuron damage in the right hand (green), underwent a right biceps brachii muscle biopsy.

ALS-18, female, with symptoms of upper and lower motor neuron damage from the right hand to the shoulder (green), underwent a right biceps brachii muscle biopsy. UMN: upper motor neuron. LMN: lower motor neuron.

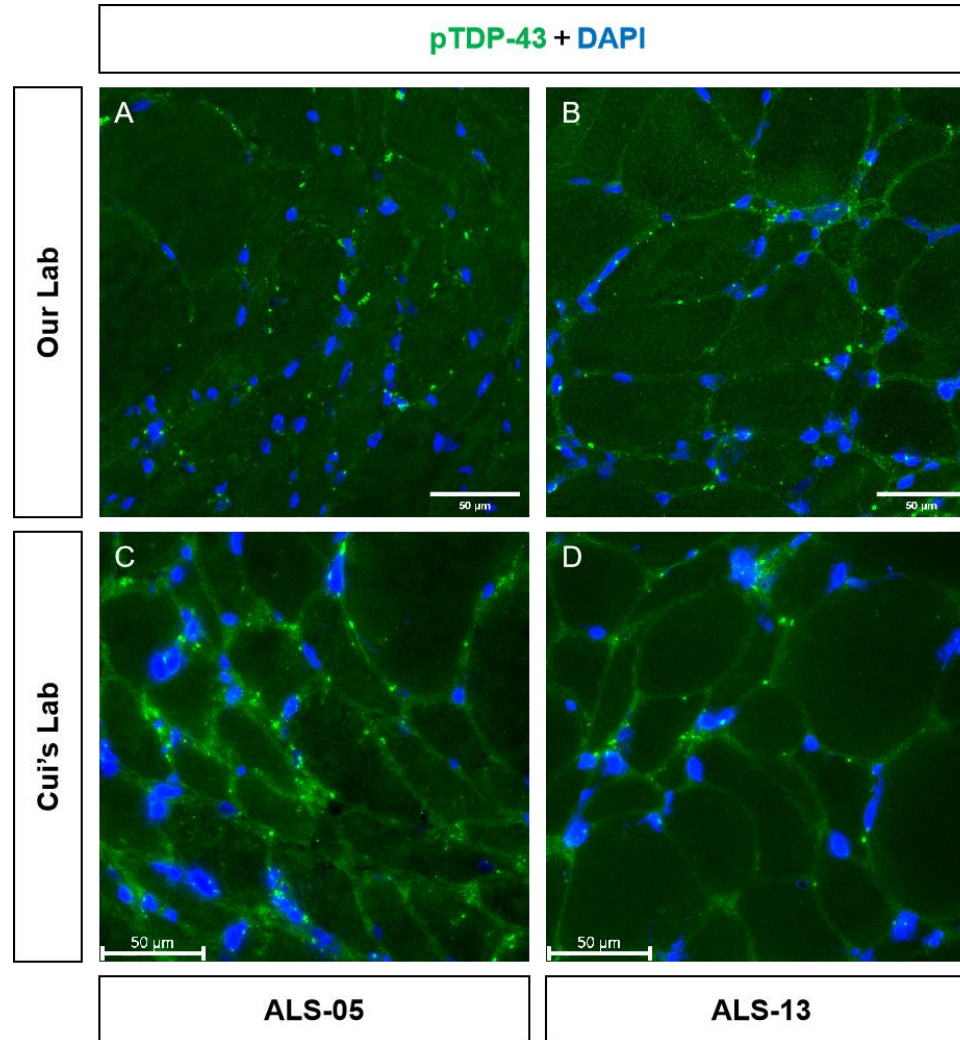

**Supplementary Figure 5** Similar results about pTDP-43 immunostaining in ALS patients with SOD1 mutations which was confirmed in our laboratory and in Meng-Chao Cui's laboratory. (A-B) Immunostaining of pTDP-43 aggregation in muscle samples from 2 SOD1-ALS patients (ID: ALS-05 and ALS-13). (C-D) Immunostaining validation result of the same patients' muscle (ID: ALS-05 and ALS-13) in Meng-Chao Cui's laboratory. Scale bar, 50μm.
